# Supplementary material
Source: HighWire-hosted journal article supplement (https://www.cmajopen.ca/highwire/filestream/89019/field_highwire_adjunct_files/1/open-2021-0159-2-at.pdf)
Supplement: open-2021-0159-2-at.pdf [file open-2021-0159-2-at.pdf]

| Name                                     | Files | References |
|------------------------------------------|-------|------------|
| ▼ ● Advantages                           | 41    | 142        |
| ▼ ● Convenience                          | 39    | 100        |
| ▼ ● Efficiency                           | 34    | 57         |
| ● Caregiver Burden                       | 4     | 6          |
| ● Didn't have to travel                  | 18    | 23         |
| ▼ ● More time efficient                  | 24    | 28         |
| ● Missing work                           | 12    | 12         |
| ● Cost savings                           | 16    | 17         |
| ● Decreased exposure to pathogens        | 12    | 13         |
| ● General Positive Remarks               | 8     | 12         |
| ▼ ● Disadvantages                        | 32    | 67         |
| ▼ ● No face-to-face interaction          | 20    | 28         |
| ● No previous relationship               | 4     | 4          |
| ● Not appropriate if more serious        | 3     | 4          |
| ● Not able to perform a physical exam    | 11    | 17         |
| ▼ ● Scheduling                           | 9     | 15         |
| ● Patients not prepared to ask questions | 5     | 5          |
| ▼ ● Technology                           | 6     | 7          |
| ● Privacy                                | 2     | 2          |
